# Supplementary material for: Superhydrophobic μ-pillars via simple and scalable SLA 3D-printing: the stair-case effect and their wetting models
Source: Royal Society of Chemistry journal article supplement (doi:10.1039/d1sm00655j), 2021-01-01
Supplement: d1sm00655j1.pdf [file d1sm00655j1.pdf]

## Supplementary Information.

### Superhydrophobic $\mu$ -Pillars via Simple and Scalable SLA 3D-Printing: The Stair-Case Effect and their Wetting Models.

José Bonilla-Cruz, Jo Ann C. Sy, Tania E. Lara-Ceniceros, Julio C. Gaxiola-López, Vincent García, Blessie Basilia, and Rigoberto C. Advincula\*

#### S1. Theoretical Models

##### *S1.1 Wenzel wetting state*

This model describes the homogeneous wettability regime of a rough surface, which happens when the liquid penetrates into the asperities and interstices of the surface, making contact with the base of the protrusions. This wetting regime is described by the equation:<sup>1</sup>

$$\cos(\theta) = r \cos \theta_0$$

Where  $\theta$  is the apparent CA of the surface which corresponds to a stable equilibrium state, which means a minimum energy state for the rough surface system. While  $\theta_0$ , is the contact angle for the smooth surface and is calculated using the Young equation.<sup>2</sup> The roughness ratio,  $r$ , is a measure of how roughness affects the wetting behavior of the surface. The roughness ratio is calculated as the ratio of real solid/liquid contact area to the apparent or projected solid/liquid interface. So, for a rough surface,  $r > 1$ .

This model indicates that the roughness of a surface intensifies its intrinsic wetting behavior which depends on its chemical nature and intermolecular forces. In other words, a hydrophobic smooth surface ( $\theta_0 > 90^\circ$ ) will be more hydrophobic (will have greater CA) as the roughness ratio increases. On the other hand, a hydrophilic surface ( $\theta_0 < 90^\circ$ ) will be more hydrophilic (lower CA) as the roughness ratio magnifies. Nevertheless, it is important to mention that SHS under Wenzel wetting state have not been reported, indicating a limitation of the Wenzel model.

### ***S1.2 Cassie-Baxter Wetting state***

In the case of a heterogeneous wetting state, due to air-pockets trapped in the asperities of a rough surface, the Wenzel equation becomes insufficient, on account of the necessity of a model that measure the apparent CA when several materials are involved. When a liquid propagates over a surface the original interface is destroyed. This process implies the increment or decrement of the total free energy of the system in order to overcome the surface free energy. The liquid propagation will extend until reach a state of minimum energy.<sup>3,4</sup> A heterogeneous interface can be obtained if a state of minimum energy is reached before the penetration of the liquid into the asperities of rough surfaces. This wetting state can be described by the Cassie-Baxter model:<sup>5</sup>

$$\cos(\theta) = \phi \cos(\theta_0) + \phi - 1$$

Where  $\phi$  is the fraction of projected solid area in contact with the liquid, whose calculation for the case of square pillars in a regular array can be observed in **Figure S1**. The Cassie-Baxter model represents an approximation of the real CA and can present great deviations and imprecisions, so its utilization is reliable for some specific geometries.<sup>6-8</sup> In the hypothetical case that  $\phi = 0$ , the  $\theta$  value becomes  $180^\circ$ , which theoretically means that the reduction of the solid/liquid contact area promotes the superhydrophobic properties. When a heterogeneous wetting state (Cassie-Baxter state) is destroyed and turns into a homogeneous wetting state (Wenzel state), is improbable that the system recovers its heterogeneous interface due to the great amount of activation energy needed for the transition.<sup>9</sup>

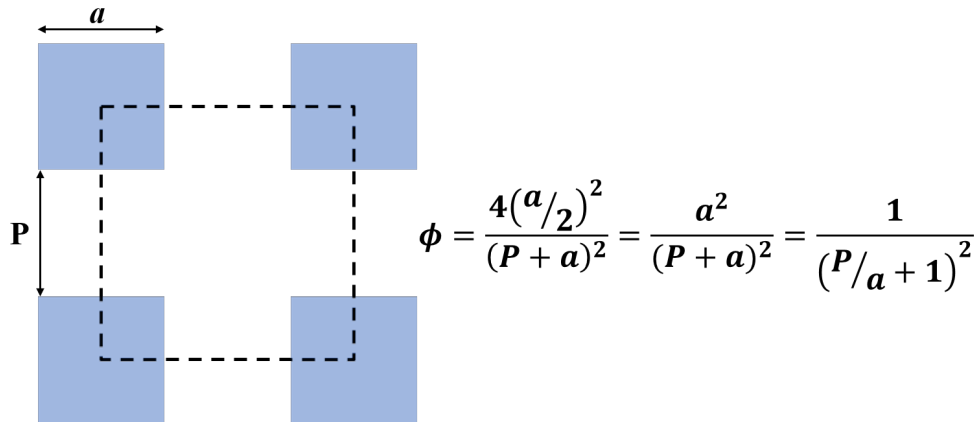

**Fig. S1.** Definition of the fraction of solid/liquid contact area,  $\phi$ .

### ***S1.3 Nagayama et al. model for intermediate wetting state***

The wetting state of a system is commonly described by the static CA or CAH, putting aside the real wetting regime of the surface, which can be different from the Wenzel and Cassie-Baxter states.

Nagayama *et al.*<sup>10</sup> developed a wetting model that includes the description of the intermediate wetting state between homogeneous (Wenzel) and heterogeneous (Cassie-Baxter) wetting regime for a rough surface. This model is based on a thermodynamic method of minimization of energy. This intermediate wetting state has been reported and has been observed on the surface of lotus.<sup>11</sup> The CA based on the intermediate wetting model depends of the geometrical parameters and a new factor,  $f$ , called effective wetting ratio. This ratio can have values between 0 and 1. Further, agrees with the classical Wenzel and Cassie-Baxter models for  $f = 1$  and  $f = 0$ , respectively. Furthermore, determines the proportion of liquid that wets into the rough surface.

The equation proposed in this model to describe the wetting phenomena arise from a method of minimization of surface free energy and the classical Young, Wenzel and Cassie-Baxter equations.

The Nagayama *et al.* model is shown below:

$$\cos \theta = \phi_{sl} \cos \theta_0 + \phi_{lv} \cos 180^\circ$$

Where  $\phi_{sl}$  and  $\phi_{lv}$  are the ratio of real solid/ liquid and liquid/vapor contact area with respect to the projected area, respectively. The ratios are defined as:

$$\begin{aligned}\phi_{sl} &= \phi + (r - \phi)f \\ \phi_{lv} &= (1 - \phi)(1 - f)\end{aligned}$$

Where  $r$  is the roughness ratio that comes from the Wenzel model, and is calculated as the area ratio of real solid/liquid interface to flat surface, as mentioned before (**see Section S1.1**).

For  $f = 1$ ,  $\phi_{sl}$  becomes equal to  $r$ , while  $\phi_{lv}$  becomes 0, which is in good agreement with Wenzel state due to the absence of trapped air-pockets between the liquid and the surface. On the other hand, for  $f = 0$ ,  $\phi_{sl}$  becomes equal to  $\phi$ , while  $\phi_{lv}$  becomes  $1 - \phi$ , which agrees with the Cassie-Baxter model. In contrast, when  $0 < f < 1$ , an intermediate wetting state is observed, while  $\phi < \phi_{sl} < r_w$ , and  $0 < \phi_{lv} < 1 - \phi$ .

The effective wetting ratio,  $f$ , is calculated empirically as shown:

$$f = 1 - \phi^{D-2}$$

Where  $D$ , is the fractal dimension of the system obtained from gray scale images using a box counting method. In Nagayama *et al.* work, the fractal dimension took a value of 2.4 for a porous silicon structure. In contrast, the fractal dimension calculated for a patterned microstructured silicon surface was 2.2.

It is noteworthy the great range of potential application of the model, that includes the Wenzel and Cassie-Baxter states, as well as the intermediate state

**Table S1.** Static, advancing, receding, and hysteresis contact Angles (in deg.) corresponding to silanized micro-PLS, 3D printed at two orientations (tilted and horizontal), and at three resolutions (low, medium, and high).

| Tag                | $\theta_s$            | $\theta_A$            | $\theta_R$            | $\theta_H$            | Tag                | $\theta_s$            | $\theta_A$            | $\theta_R$            | $\theta_H$           |
|--------------------|-----------------------|-----------------------|-----------------------|-----------------------|--------------------|-----------------------|-----------------------|-----------------------|----------------------|
| TH_flat            | 112 ± 1 <sup>a)</sup> | 125 ± 1 <sup>a)</sup> | 63 ± 1 <sup>a)</sup>  | 63 ± 1 <sup>a)</sup>  | FH_flat            | 108 ± 1 <sup>a)</sup> | 126 ± 1 <sup>a)</sup> | 49 ± 1 <sup>a)</sup>  | 77 ± 1 <sup>a)</sup> |
| TH_cylinder        | 146 ± 1               | 73 ± 1                | 45 ± 1 <sup>a)</sup>  | 28 ± 1 <sup>a)</sup>  | FH_cylinder        | 128 ± 1 <sup>a)</sup> | 136 ± 3 <sup>a)</sup> | 88 ± 1 <sup>a)</sup>  | 47 ± 1               |
| <b>TH_cone</b>     | <b>157 ± 1</b>        | <b>170 ± 2</b>        | <b>153 ± 1</b>        | <b>17 ± 1</b>         | FH_cone            | 146 ± 2               | 154 ± 1               | 118 ± 1 <sup>a)</sup> | 35 ± 1               |
| <b>TH_tulip</b>    | <b>150 ± 1</b>        | <b>157 ± 2</b>        | <b>142 ± 1</b>        | <b>15 ± 1</b>         | <b>FH_tulip</b>    | <b>154 ± 1</b>        | <b>155 ± 1</b>        | <b>136 ± 1</b>        | <b>19 ± 1</b>        |
| <b>TH_mushroom</b> | <b>150 ± 1</b>        | <b>163 ± 1</b>        | <b>140 ± 1</b>        | <b>23 ± 1</b>         | <b>FH_mushroom</b> | <b>152 ± 1</b>        | <b>156 ± 1</b>        | <b>144 ± 2</b>        | <b>12 ± 1</b>        |
| TH_M. mouse        | 152 ± 1               | 166 ± 1               | 107 ± 1 <sup>a)</sup> | 59 ± 1                | FH_M. mouse        | 147 ± 1               | 165 ± 3               | 124 ± 1 <sup>a)</sup> | 41 ± 2               |
| TH_cubic           | 157 ± 2               | 159 ± 2               | 121 ± 3 <sup>a)</sup> | 38 ± 2                | FH_cubic           | 144 ± 4               | 147 ± 1               | 127 ± 1 <sup>a)</sup> | 19 ± 1               |
| TH_pyramid         | 155 ± 1               | 165 ± 2               | 134 ± 4 <sup>a)</sup> | 31 ± 3                | <b>FH_pyramid</b>  | <b>160 ± 4</b>        | <b>163 ± 2</b>        | <b>149 ± 5</b>        | <b>14 ± 3</b>        |
| <b>TH_spiral</b>   | <b>152 ± 1</b>        | <b>159 ± 1</b>        | <b>151 ± 4</b>        | <b>8 ± 3</b>          | FH_spiral          | 154 ± 1               | 165 ± 3               | 126 ± 2 <sup>a)</sup> | 19 ± 2               |
| <b>TH_sphere</b>   | <b>154 ± 1</b>        | <b>172 ± 1</b>        | <b>143 ± 1</b>        | <b>29 ± 1</b>         | FH_sphere          | 148 ± 1               | 151 ± 1               | 130 ± 1               | 21 ± 1               |
| TH_pine            | 139 ± 1 <sup>a)</sup> | 162 ± 2 <sup>a)</sup> | 113 ± 2 <sup>a)</sup> | 49 ± 2 <sup>a)</sup>  | FH_pine            | 150 ± 1               | 140 ± 3 <sup>a)</sup> | 70 ± 2 <sup>a)</sup>  | 70 ± 2               |
| TM_flat            | 113 ± 1 <sup>a)</sup> | 115 ± 1 <sup>a)</sup> | 64 ± 4 <sup>a)</sup>  | 50 ± 3 <sup>a)</sup>  | FM_flat            | 122 ± 4 <sup>a)</sup> | 127 ± 2 <sup>a)</sup> | 60 ± 2 <sup>a)</sup>  | 67 ± 2 <sup>a)</sup> |
| TM_cylinder        | 137 ± 1 <sup>a)</sup> | 110 ± 3 <sup>a)</sup> | 64 ± 4 <sup>a)</sup>  | 46 ± 3 <sup>a)</sup>  | FM_cylinder        | 120 ± 1 <sup>a)</sup> | 111 ± 2 <sup>a)</sup> | 63 ± 6 <sup>a)</sup>  | 47 ± 4               |
| TM_cone            | 155 ± 1               | 156 ± 2               | 128 ± 6 <sup>a)</sup> | 28 ± 4                | FM_cone            | 158 ± 2               | 157 ± 3               | 66 ± 1 <sup>a)</sup>  | 91 ± 2               |
| <b>TM_tulip</b>    | <b>151 ± 1</b>        | <b>168 ± 2</b>        | <b>145 ± 3</b>        | <b>23 ± 3</b>         | FM_tulip           | 144 ± 1               | 152 ± 3               | 120 ± 1 <sup>a)</sup> | 31 ± 2               |
| <b>TM_mushroom</b> | <b>152 ± 3</b>        | <b>164 ± 2</b>        | <b>142 ± 4</b>        | <b>22 ± 3</b>         | FM_mushroom        | 148 ± 1               | 159 ± 2               | 132 ± 1               | 27 ± 2               |
| <b>TM_M. mouse</b> | <b>164 ± 1</b>        | <b>170 ± 2</b>        | <b>146 ± 1</b>        | <b>24 ± 2</b>         | FM_M. mouse        | 147 ± 1               | 166 ± 5               | 137 ± 1               | 16 ± 3               |
| <b>TM_cubic</b>    | <b>160 ± 3</b>        | <b>167 ± 2</b>        | <b>157 ± 3</b>        | <b>10 ± 2</b>         | FM_cubic           | 145 ± 3               | 156 ± 4               | 115 ± 1 <sup>a)</sup> | 40 ± 3               |
| <b>TM_pyramid</b>  | <b>157 ± 3</b>        | <b>168 ± 2</b>        | <b>156 ± 4</b>        | <b>12 ± 3</b>         | <b>FM_pyramid</b>  | <b>153 ± 2</b>        | <b>165 ± 2</b>        | <b>146 ± 2</b>        | <b>19 ± 2</b>        |
| <b>TM_spiral</b>   | <b>154 ± 1</b>        | <b>164 ± 1</b>        | <b>149 ± 6</b>        | <b>15 ± 4</b>         | FM_spiral          | 144 ± 1               | 166 ± 2               | 114 ± 2 <sup>a)</sup> | 53 ± 2               |
| <b>TM_sphere</b>   | <b>151 ± 1</b>        | <b>167 ± 2</b>        | <b>147 ± 1</b>        | <b>20 ± 1</b>         | FM_sphere          | 145 ± 1               | 164 ± 2               | 134 ± 1 <sup>a)</sup> | 29 ± 2               |
| TM_pine            | 147 ± 1               | 111 ± 1 <sup>a)</sup> | 64 ± 4 <sup>a)</sup>  | 47 ± 3 <sup>a)</sup>  | FM_pine            | 128 ± 1 <sup>a)</sup> | 165 ± 3 <sup>a)</sup> | 75 ± 6 <sup>a)</sup>  | 90 ± 4               |
| TL_flat            | 127 ± 1 <sup>a)</sup> | 135 ± 1 <sup>a)</sup> | 85 ± 1 <sup>a)</sup>  | 50 ± 1 <sup>a)</sup>  | FL_flat            | 105 ± 1 <sup>a)</sup> | 105 ± 1 <sup>a)</sup> | 46 ± 2 <sup>a)</sup>  | 60 ± 2               |
| TL_cylinder        | 134 ± 1 <sup>a)</sup> | 127 ± 3 <sup>a)</sup> | 78 ± 1 <sup>a)</sup>  | 49 ± 2 <sup>a)</sup>  | FL_cylinder        | 154 ± 1               | 99 ± 1 <sup>a)</sup>  | 95 ± 1 <sup>a)</sup>  | 4 ± 1                |
| TL_cone            | 159 ± 3               | 151 ± 1 <sup>a)</sup> | 92 ± 1 <sup>a)</sup>  | 59 ± 1 <sup>a)</sup>  | FL_cone            | 156 ± 4               | 166 ± 3               | 129 ± 3 <sup>a)</sup> | 37 ± 3               |
| <b>TL_tulip</b>    | <b>166 ± 1</b>        | <b>171 ± 1</b>        | <b>142 ± 2</b>        | <b>29 ± 1</b>         | FL_tulip           | 147 ± 1               | 165 ± 4               | 134 ± 3 <sup>a)</sup> | 31 ± 3               |
| <b>TL_mushroom</b> | <b>152 ± 1</b>        | <b>156 ± 1</b>        | <b>144 ± 4</b>        | <b>12 ± 3</b>         | FL_mushroom        | 149 ± 1               | 154 ± 1               | 132 ± 1 <sup>a)</sup> | 23 ± 1               |
| TL_M. mouse        | 156 ± 1               | 152 ± 1               | 111 ± 4 <sup>a)</sup> | 41 ± 3 <sup>a)</sup>  | FL_M. mouse        | 149 ± 1               | 155 ± 4               | 127 ± 8 <sup>a)</sup> | 28 ± 6               |
| TL_cubic           | 152 ± 1               | 168 ± 2               | 124 ± 1 <sup>a)</sup> | 44 ± 2 <sup>a)</sup>  | FL_cubic           | 145 ± 1               | 155 ± 1               | 107 ± 3 <sup>a)</sup> | 48 ± 2               |
| TL_pyramid         | 156 ± 1               | 165 ± 2               | 56 ± 3 <sup>a)</sup>  | 109 ± 3 <sup>a)</sup> | <b>FL_pyramid</b>  | <b>157 ± 1</b>        | <b>157 ± 2</b>        | <b>136 ± 2</b>        | <b>20 ± 2</b>        |
| TL_spiral          | 151 ± 1               | 160 ± 1               | 51 ± 3 <sup>a)</sup>  | 110 ± 2 <sup>a)</sup> | FL_spiral          | 154 ± 1               | 168 ± 2               | 105 ± 1 <sup>a)</sup> | 63 ± 1               |
| TL_sphere          | 154 ± 1               | 159 ± 1               | 129 ± 1 <sup>a)</sup> | 30 ± 1                | FL_sphere          | 155 ± 1               | 155 ± 2               | 107 ± 1 <sup>a)</sup> | 48 ± 1               |
| TL_pine            | 108 ± 2 <sup>a)</sup> | 117 ± 1 <sup>a)</sup> | 78 ± 1 <sup>a)</sup>  | 39 ± 1 <sup>a)</sup>  | FL_pine            | 128 ± 3 <sup>a)</sup> | 133 ± 1 <sup>a)</sup> | 120 ± 1 <sup>a)</sup> | 13 ± 1               |

<sup>a)</sup>Wenzel regimen;  $\theta_s$  = static CA;  $\theta_A$  = advancing CA;  $\theta_R$  = receding CA;  $\theta_H$  = hysteresis CA, measured by the increment-decrement method.

Printing orientation: T = tilted, F = flat (horizontal)

Printing resolution: H, M, L = high, medium and low, respectively.

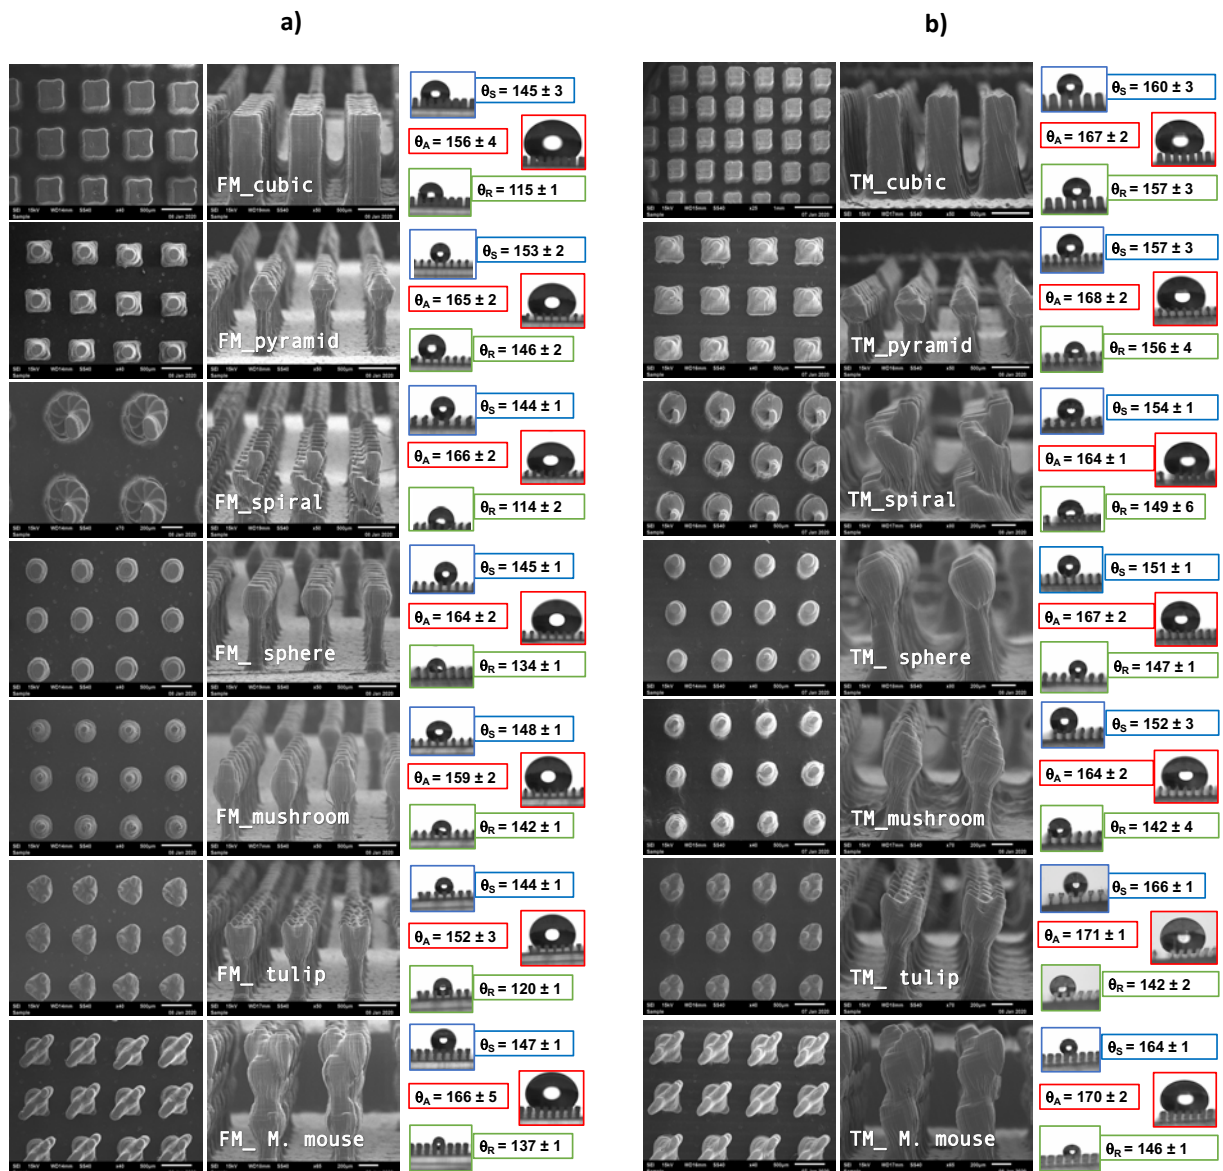

**Fig. S2.** Micrographs by SEM and their CA values corresponding to silanized  $\mu$ -PLS 3D printed at medium resolution: a) horizontal orientation, b) tilted orientation.

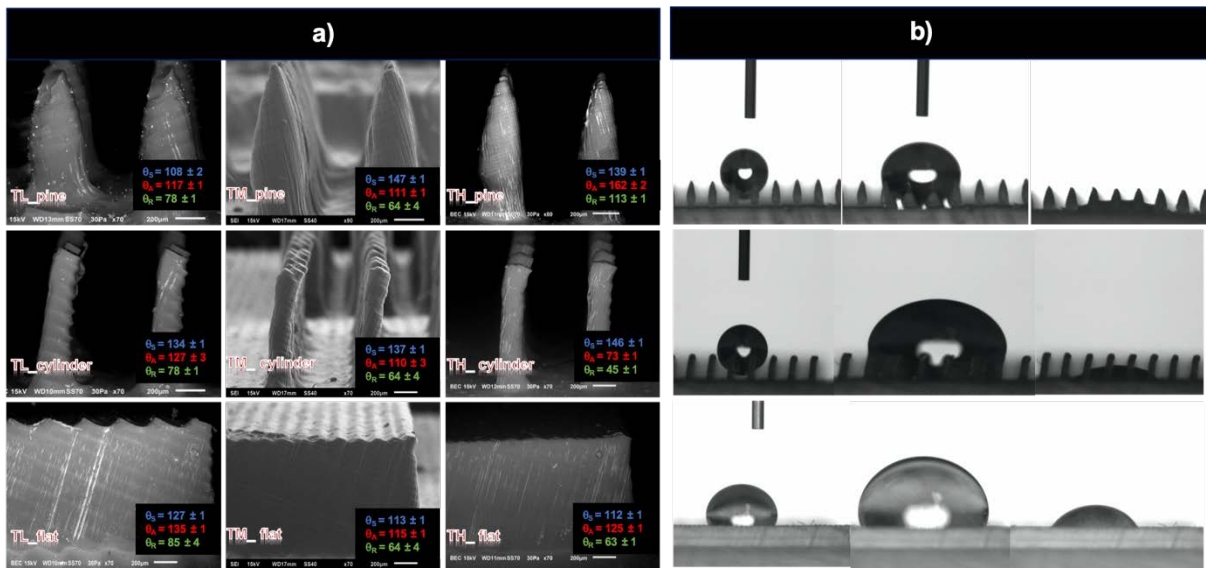

**Fig. S3. a)** Micrographs by SEM of silanized micro-PLS 3D-printed at tilted orientation and three printing resolutions (low, medium, and high), corresponding to geometrical shapes like a pine, cylindrical, and flat surfaces. **b)** Contact angle pictures corresponding to static, advancing, and receding contact angles. This behavior was observed regardless of the printing resolution.

Geometrical shapes with a sharp shape (pine) or with a cylindrical shape did not show a Cassie-Baxter regimen when the contact angles were measured. Nonetheless, they supported the droplet, which showed good sphericity to get a value of static CAs. When the size of the droplet was increased to measure the advancing CAs, it touched the base surface to reach the Wenzel regimen, as shown in Fig. S1b. Flat surfaces exhibited a Wenzel regimen regardless of the printing resolution.
